# Supplementary material for: Microinjection Manipulation Resulted in the Increased Apoptosis of Spermatocytes in Testes from Intracytoplasmic Sperm Injection (ICSI) Derived Mice
Source: PLoS One. 2011 Jul 20;6(7):e22172. doi: 10.1371/journal.pone.0022172 (PMC3140508; doi:10.1371/journal.pone.0022172)
Supplement: Table S1 — Full peptide data sets. (XLS) [file pone.0022172.s001.xls]

## Sheet: Sheet1
Table S1: Identification of differentiated proteins using MALDI-TOF
SpotID	P value (ICSI-IVF)	Ratio = (+)ICSI/IVF (-)ICSI/IVF	icsi-ivf	Database	Purity	Entry Name	AC	Protein Name	MW actual(kD)	PI actual	MW theor.	PI theor.	Score	Expect	Nonhomologous protein	Nonhomologous expect	Nonhomologous score	Nsearched	Nmatched	Converage%	PeaklistQuery	PeaklistMatched	PPM
i2793	0.00166138	-3.41	de	IPI_mouse (web) (local)	pure	IPI00111218	Aldh2	Aldehyde dehydrogenase, mitochondrial precursor	20	6.65	57015	7.53	209	6.8e-17	0610010D24Rik protein	0.0036	72	75	25	0.42	701.465104920341,758.449685079089,777.441519415634,829.473847620382,832.487023974862,846.506397585462,878.511819552155,880.484218098102,902.507820779653,904.443198673501,906.463515340456,907.43669406096,972.54033619167,982.445073974037,990.522090275016,1040.61591005599,1051.70904068355,1060.55505780363,1063.56619262549,1067.58531069451,1085.58680549782,1100.64406739216,1111.62070057112,1132.62991…	777.441519415634,829.473847620382,902.507820779653,907.43669406096,972.54033619167,990.522090275016,1040.61591005599,1060.55505780363,1100.64406739216,1132.62991930681,1177.69165099065,1233.67027809913,1288.72877947479,1385.8354228717,1419.79253618178,1470.81243600637,1506.7580057163,1531.77791016346,1555.84248666885,1599.83011273516,1634.83928281296,1774.84671899169,1844.07162837987,2442.2806688…	29
i876	0.00342656	2.04	in	IPI_mouse (web) (local)	pure	IPI00115522	Fga	fibrinogen, alpha polypeptide	71	6.74	61801	7.16	153	2.7e-11	Spats1 Adult male testis cDNA	0.42	51	71	23	0.37	720.330336738524,724.466657624942,758.435581447693,772.419158095558,799.506505330527,843.516843032032,898.581523816816,904.459977180344,906.465663948563,927.579897398578,938.517388132252,954.512706778133,958.5380395571,959.547563431488,968.446927858814,971.585188191534,976.567191361197,1026.54433904778,1051.73251997958,1057.61037007029,1060.60809833317,1067.59479859569,1086.63165908363,1100.67851…	720.330336738524,799.506505330527,927.579897398578,938.517388132252,954.512706778133,958.5380395571,959.547563431488,971.585188191534,1026.54433904778,1100.67851519606,1148.63616911897,1173.5751484954,1262.64776732713,1267.73340901382,1355.79660616407,1389.77995696529,1447.78770634323,1473.76885127265,1492.76304486995,1745.8331487746,2346.99869815869,2503.08017633235,2839.22003081698,	49
s872	0.00122492	NI	in	IPI_mouse (web) (local)	pure	IPI00119886	Isyna1	Myo-inositol 1-phosphate synthase A1	73	5.69	61520	5.99	80	0.00052	Flnc	1	47	42	11	0.21	758.45395911666,777.41697195372,805.413113549515,855.048603105718,861.071619481713,956.529157170883,963.485937633706,985.554120449872,1038.52200474573,1079.58720606213,1113.65809812329,1120.57295926217,1155.59837142544,1177.59683258674,1183.64394642654,1193.68457846555,1262.6545295594,1277.72613664376,1289.71819227436,1302.69944867773,1305.74097832705,1310.67218332376,1333.73484425801,1347.816982…	956.529157170883,963.485937633706,985.554120449872,1038.52200474573,1113.65809812329,1120.57295926217,1183.64394642654,1347.81698290263,1633.96162095339,1859.92860843282,2442.16221216506	17
s2568	0.0221109	1.52	in	IPI_mouse (web) (local)	pure	IPI00119945	Nit2	Nit protein 2	31	6.24	30825	6.44	143	2.7e-10	LOC677266 similar to Nesprin-2	0.0012	76	52	14	0.45	705.330379342947,710.342247761598,724.454473852271,729.416005817241,757.42390341777,758.436202525427,825.457061780449,846.516037562978,854.517857828344,874.522617363457,876.420734647227,883.508328484589,904.457491743332,906.485690086429,932.48282723804,934.548071458373,946.553543351579,976.566670436129,1015.59514565333,1029.62065814276,1051.73039604962,1057.60260026532,1067.61374576227,1120.74148…	705.330379342947,729.416005817241,1181.67718734958,1199.63142800626,1253.75949374762,1309.76014480182,1421.94936554996,1561.86358723719,1667.89316562348,1788.98093071245,1795.98301074226,1919.97549013442,1922.87690390313,1999.16770775126,	42
c1571	0.0086558	-5.56	de	IPI_mouse (web) (local)	pure	IPI00124692	Taldo1	Transaldolase	46	6.31	37534	6.57	78	0.00084	TGF beta-inducible nuclear protein 1	0.14	56	54	13	0.33	701.460951344841,744.405835096614,772.41216587275,846.521191518362,876.462999375612,904.457479223945,906.453627782863,932.505106916353,934.565630672741,941.617351817469,981.531398405098,991.573787903927,997.548381598868,1014.57312087468,1051.68942135209,1055.63649886568,1057.59917323468,1067.58602091736,1092.57846510301,1097.63920777974,1133.66913377609,1161.68097511343,1177.61336067299,1212.6012…	876.462999375612,934.565630672741,981.531398405098,991.573787903927,997.548381598868,1133.66913377609,1229.74895382902,1248.64363815438,1252.69241702491,1268.686289434,1311.71728231085,1392.76813841942,1671.85863271806,	36
s2077	0.00575786	NI	in	IPI_mouse (web) (local)	pure	IPI00125091	Lasp1	LIM and SH3 domain protein 1	35	6.4	30374	6.61	163	2.7e-12	Lasp1	0.058	60	71	20	0.49	700.366139378701,701.466593071675,758.442144677986,786.412074909428,798.494050986813,846.500162522275,887.536472647057,904.417167973744,906.495522659007,913.454875294193,914.543084977365,920.400489253382,949.573395800969,972.514139340027,981.470093226618,982.458762177445,996.539803713014,1014.57640120095,1042.48364163625,1049.59862229181,1051.72136921283,1055.64511293661,1057.60110413196,1060.576…	786.412074909428,972.514139340027,981.470093226618,1042.48364163625,1067.59902338834,1158.60209151888,1202.65688503495,1212.52138822342,1224.62357800951,1301.67935883389,1418.77910463082,1443.84138580581,1457.73906400689,1473.74262144499,1560.80509519823,1603.88650083884,1608.8064915526,1624.81856867114,1826.83478680145,2008.97160929811,	25
i1780	0.0355555	1.56	in	IPI_mouse (web) (local)	pure	IPI00132194	Scye1	small inducible cytokine subfamily E, member 1	45	8	35544	8.79	123	2.7e-08	Vps54	0.12	56	65	17	0.48	701.444404975102,724.456433831376,743.407838660609,747.387424053643,758.42639138705,772.395888445964,803.963068678417,812.477900192017,826.539032864626,829.48710555178,868.541967551787,874.524506467143,878.524799969854,880.495668647157,886.537031233834,897.537039012878,908.521465665171,919.524188021885,932.528785496099,957.589911641471,972.567011656294,1013.54120156903,1029.60638554258,1051.72108…	747.387424053643,829.48710555178,919.524188021885,932.528785496099,1289.72827380108,1305.74513552907,1401.83536888819,1520.8454212542,1732.88767228531,1917.98147817529,1990.0012506508,2021.0596674612,2037.06860369416,2169.02230145059,2230.14406486828,2297.09268585882,2589.33445456825,	23
c2216	0.0111692	2.17	in	IPI_mouse (web) (local)	pure	IPI00133110	Txndc12	Thioredoxin domain-containing protein 12 precursor	23	6.53	19208	5.14	92	3.7e-05	golgi autoantigen	0.18	55	22	7	0.37	757.177761347715,758.424753000762,779.388869685515,788.386980818773,904.45667147384,945.523004660486,968.572202083493,989.605239164931,1014.57422320509,1036.5865915014,1051.7322185863,1057.61065476432,1124.60246400506,1128.5802875362,1139.64069351679,1140.59886634388,1156.57657174207,1254.76729566227,1262.65368157718,1388.80300892443,1565.92691079654,1702.91832034248,	779.388869685515,788.386980818773,989.605239164931,1036.5865915014,1124.60246400506,1565.92691079654,1702.91832034248,	38
i2313	0.0498185	-1.5	de	IPI_mouse (web) (local)	pure	IPI00133801	1110005A23Rik	Nuclear protein Hcc-1	29	6.58	23575	6.29	79	0.00076	Dnahc1 similar to dynein	0.65	49	39	9	0.37	701.463890034574,758.425058088951,839.085060296804,935.535986637507,957.514821612614,1039.56889046851,1056.6391801291,1061.58079987709,1067.57475782217,1079.61234456017,1101.61722823596,1119.6343527559,1123.596323114,1141.61579930973,1155.60515745214,1177.59016677069,1193.5706717745,1199.57187732571,1215.5348857069,1247.73341081348,1261.68960310915,1269.71608886354,1292.6963105093,1314.6635122150…	758.425058088951,935.535986637507,1056.6391801291,1079.61234456017,1101.61722823596,1119.6343527559,1247.73341081348,1330.7516655612,1871.88966549954,	22
i1455	0.0250778	1.54	in	IPI_mouse (web) (local)	pure	IPI00134746	Ass1	Argininosuccinate synthase	54	8	46840	8.36	178	8.6e-14	Mov10	1.2	47	87	26	0.44	741.41915708209,757.414152752925,773.415312291689,783.425071237986,818.427253730961,826.512155108598,843.511598960496,845.477070284282,858.47775336401,866.461487811921,882.477710238077,895.448511917445,905.538747594853,908.462586177486,916.538021047321,919.50616278453,926.433631584248,932.508700434339,956.461051400353,972.475992780035,976.586337661574,982.528314469637,984.569253642888,993.6001897…	741.41915708209,843.511598960496,845.477070284282,858.47775336401,895.448511917445,905.538747594853,919.50616278453,932.508700434339,956.461051400353,972.475992780035,999.611523554796,1088.64282751205,1104.64775350476,1186.7678247029,1196.64375383252,1212.65330770621,1228.72168520909,1247.67801228646,1364.79017365918,1450.84387676413,1569.86572336241,1588.86753665423,1590.9228620362,1693.01237510…	23
i957	0.0176873	-1.51	de	IPI_mouse (web) (local)	pure	IPI00223253	Hnrpk	Isoform 1 of Heterogeneous nuclear ribonucleoprotein K	68	5.6	51230	5.39	110	5.4e-07	CDNA sequence BC048390	3.2	42	34	15	0.29	758.440924355749,777.919234259355,855.46507656173,858.530314297425,950.417214970453,998.397876252513,1014.40883817761,1053.65659975376,1098.47882913352,1105.55536891941,1153.56841697253,1155.58440295601,1169.56094629574,1177.57784814375,1194.72177563215,1206.71342435068,1210.70834909514,1216.70332789036,1253.73688256459,1403.89278077077,1421.83793984901,1439.81024743155,1515.22420574201,1518.9402…	998.397876252513,1014.40883817761,1053.65659975376,1098.47882913352,1105.55536891941,1153.56841697253,1169.56094629574,1194.72177563215,1421.83793984901,1518.94027147953,1549.6627269276,1735.8339669336,1751.8056635973,1780.80029039788,2068.99815418436,	17
s2074	0.0376023	1.56	in	IPI_mouse (web) (local)	pure	IPI00223757	Akr1b3	Aldose reductase	43	6.08	36052	6.71	70	0.0059	UPF0415 protein C7orf25 homolog	0.9	48	67	10	0.3	758.426729121466,798.483888602771,803.951840351562,826.573345760932,832.461618623277,843.515682627228,880.483658622691,901.551226837696,904.45455296226,906.510070940366,913.431679892605,951.485217798741,973.555031228665,976.57030029252,982.458026610196,1051.72599239553,1057.60837597199,1060.60475570061,1067.5944689679,1092.55516587989,1105.67075828681,1126.62596840405,1142.62138700072,1201.691206…	758.426729121466,843.515682627228,901.551226837696,906.510070940366,1105.67075828681,1242.66407409459,1330.76012096097,1542.9397327403,1587.88844805788,2695.19242424534,	38
c2961	0.0321703	-1.64	de	IPI_mouse (web) (local)	pure	IPI00230721	Crabp1	Cellular retinoic acid-binding protein 1	20	5.16	15753	5.3	84	0.00023	Igfbp7	0.078	58	71	10	0.56	720.805577181754,722.802119441333,726.322247659583,758.390728516858,765.575337346756,767.575731318965,769.578749096784,775.385313785973,798.456167874164,803.983451035289,812.340080512605,826.588958261984,846.524647002843,899.537995805656,904.648176270838,913.431415839716,944.551568276505,945.54152239687,960.559899058219,965.504522206306,982.456872255201,989.567638664261,1011.67055830915,1016.5586…	726.322247659583,944.551568276505,960.559899058219,1113.57680509688,1338.71916526662,1423.68922137407,1447.88963372634,1551.77344135528,1568.82112153197,1575.97832656521,	35
s2065	0.00251217	NI	in	IPI_mouse (web) (local)	pure	IPI00273096	Akr1b8	Aldose reductase-related protein 2	43	6.26	36440	5.97	117	1.1e-07	Coro2a	0.0039	71	65	14	0.5	700.353412940011,758.4092387427,763.326666993692,769.396751103126,789.358213922698,836.420671318637,843.539340337725,846.460735481218,882.595925743284,887.545887478129,976.591592783187,1011.67250211505,1015.63444643691,1048.56878191537,1049.61239131843,1051.72552282104,1057.60312315105,1085.59286474045,1093.62610707645,1121.64834144171,1130.58711562111,1133.65281248136,1145.61519807875,1149.65262…	700.353412940011,769.396751103126,836.420671318637,882.595925743284,887.545887478129,976.591592783187,1048.56878191537,1204.64706636984,1263.71845563084,1404.84064564163,1631.87070241567,2208.08497704812,2513.03540230807,3123.53487338148,	31
s1573	0.01814	1.58	in	IPI_mouse (web) (local)	pure	IPI00319992	Hspa5	78 kDa glucose-regulated protein precursor	54	5.08	72492	5.07	71	0.0044	Hscb Co-chaperone protein HscB	0.015	66	87	15	0.25	724.476543845901,726.34309564655,743.437185707687,758.454408971463,795.450409680961,796.479955359418,798.485040680309,826.555314578934,843.527158381717,846.502725223982,874.533130759626,901.559778910825,904.456877156062,906.46510751714,923.591709119475,932.507450711644,934.51541521951,945.564975961414,951.489372304857,967.667472722502,976.553279923039,986.552826226253,1011.66186681926,1014.559937…	758.454408971463,934.51541521951,986.552826226253,1191.68485935463,1210.63977362913,1316.75396394753,1460.79450848751,1528.79586544765,1588.88752084252,1798.83583852538,1801.91425307267,1836.95109972521,1920.02711189207,1934.01709415444,2148.98087607076,	36
i1960	0.000430112	1.52	in	IPI_mouse (web) (local)	pure	IPI00323592	Mdh2	Malate dehydrogenase, mitochondrial precursor	40	8	36045	8.93	89	7.5e-05	Sdccag8	0.0092	68	46	12	0.37	701.464151781595,758.446974553087,772.415311073748,774.393724393694,826.522179199876,846.525015191864,880.486440980809,904.453408347078,908.518859319183,931.423815004855,965.510000570201,1014.555255853,1049.59805242006,1057.58965610262,1067.58199184286,1071.61207417904,1083.57024652366,1147.69102401072,1155.63748309512,1177.59833025865,1193.57332018904,1217.54799216358,1233.75971439503,1338.75274…	772.415311073748,1067.58199184286,1083.57024652366,1147.69102401072,1233.75971439503,1338.75274678481,1454.74027552563,1470.74774323548,1560.83338921118,1601.88560332138,2143.14887556139,2393.22223815973,	29
c2528	0.0160965	-8.69	de	IPI_mouse (web) (local)	pure	IPI00337955	Polr2e	DNA-directed RNA polymerase II 23 kDa polypeptide	20	5.3	24669	5.69	101	4.3e-06	Krt7 Adult male kidney cDNA	0.012	67	73	13	0.49	715.344049380481,724.472679941433,725.324522593022,728.377369029082,729.367995200069,737.410666464042,758.440664195754,769.436311289847,783.432237105418,793.455748837165,798.485243944822,811.449459218584,825.483356968777,826.52460431453,846.515271184406,854.515076526186,874.508875289975,884.529492426293,913.429967788011,926.529291440886,932.505284665316,940.548958220665,964.503105134674,982.44861…	715.344049380481,725.324522593022,729.367995200069,758.440664195754,783.432237105418,926.529291440886,998.597824651461,1020.52855354709,1059.600618843,1099.66529569945,1189.63516492148,1444.77842908114,1458.82849318815,	45
s977	0.0216119	1.83	in	IPI_mouse (web) (local)	pure	IPI00379513	Fubp3	11 days pregnant adult female placenta cDNA, RIKEN full-length enric	70	8	62264	8.59	98	8.4e-06	Kelch-like protein 7	1.2	46	67	15	0.32	714.427066369668,724.469475087048,758.43836115022,779.368796734968,833.45610391528,843.517570378267,906.480088371023,913.515656569829,959.615845078947,973.551330401162,982.453188599704,1003.58349736214,1018.60333824745,1051.72623563545,1086.58703247544,1092.56413046018,1114.62301152808,1128.64000668918,1129.65545652849,1193.66029975894,1201.67242844243,1254.72659333953,1262.65810518743,1267.64215…	913.515656569829,959.615845078947,1018.60333824745,1086.58703247544,1114.62301152808,1128.64000668918,1359.77119822008,1412.85231582237,1501.81324576376,1566.83978014929,1584.77193974629,1716.88308319358,1762.93992137579,2356.00289205716,3159.51327496684,	43
i2747	0.00102726	ND	de	IPI_mouse (web) (local)	pure	IPI00405390	Nudt9	ADP-ribose pyrophosphatase, mitochondrial precursor	21	5.78	38808	6.28	77	0.0012	10 days neonate cerebellum cDNA	0.84	48	33	9	0.26	715.403984548283,758.438724534634,801.194507021944,826.524259067288,846.522849072665,904.451898690539,906.473549504256,908.220317868537,932.482720999236,1039.65142388161,1051.69690425381,1057.60305686522,1159.67135038474,1193.69599541954,1220.68445334746,1230.65860006684,1248.68414938793,1258.70189733989,1358.74667265277,1364.75116512402,1447.79933757683,1451.79604318969,1463.79951629592,1479.798…	715.403984548283,1193.69599541954,1220.68445334746,1230.65860006684,1364.75116512402,1447.79933757683,1496.67132709723,1632.84988809759,1761.92749409825,	46
c2407	0.0445227	-2.63	de	IPI_mouse (web) (local)	pure	IPI00467266	Dut	10 days embryo whole body cDNA, RIKEN full-length enriched library, cl	20	5.8	17545	5.74	110	5.4e-07	Myh2 protein	0.1	57	67	11	0.79	701.45711036498,714.394806163977,720.819913433991,759.415742319033,765.580919219717,767.574246466474,779.413884806105,818.390587117706,860.46552285404,911.53519673683,913.410726992575,945.513335892921,960.529481072642,978.552762763628,982.449504669659,988.574595471315,1002.56348266268,1006.54768355264,1016.56061430061,1024.54976182191,1029.63881659934,1067.56086148545,1092.54946264351,1094.602028…	779.413884806105,818.390587117706,1002.56348266268,1330.75140540096,1448.72361767775,1453.78870175384,1536.79097417982,1705.85072588857,2022.95853960981,2157.97186454316,2858.31682240131,	23
i2876	0.03038	NI	in	IPI_mouse (web) (local)	pure	IPI00649135	Gstm1	Glutathione S-transferase, mu 1	24	6.8	23692	5.84	99	7.1e-06	Krt17 Keratin	0.18	55	69	12	0.59	767.319203232549,775.393590132353,793.455741280197,846.522661594088,945.528339651461,956.539612662753,973.55248191465,976.53486305117,980.515792877453,982.460803698752,989.56951666551,994.461150053171,1003.58742809253,1008.51551331434,1015.61119354779,1029.62494841334,1036.56690745466,1049.58849305128,1051.67693814862,1078.64504944382,1096.65281986179,1122.62130778845,1126.61092004105,1201.677377…	793.455741280197,846.522661594088,956.539612662753,976.53486305117,1015.61119354779,1287.58819941083,1379.77896706884,1390.7402367339,1479.76353781522,1675.88823607213,1898.99902282806,1993.9807075442,	36
c2405	0.00136843	-3.41	de	IPI_mouse (web) (local)	pure	IPI00756400	Filip1	Filamin A interacting protein 1	20	6.65	138455	8.35	86	0.00013	Apolipoprotein	0.045	61	67	24	0.17	703.319284747756,708.297846159132,749.33546900537,758.418976159653,794.365694120769,802.427256499976,832.4747620718,913.438064063928,945.528967261097,948.450147503432,951.491786939844,963.488367444355,973.559953849998,976.530737883468,982.461586096665,1006.46195544938,1029.61681518713,1057.55252079994,1060.60495483182,1078.64460671219,1092.55379128066,1111.60059213193,1125.58394666218,1140.612713…	703.319284747756,708.297846159132,794.365694120769,802.427256499976,832.4747620718,913.438064063928,945.528967261097,948.450147503432,1057.55252079994,1111.60059213193,1201.67729139342,1262.66662968445,1267.64200206343,1277.76575867943,1322.72297925674,1330.77637715282,1359.77918915832,1410.77376130444,1419.80287947418,1479.80245543829,1501.85169551032,1539.84828228742,1584.776031683,1652.9135497…	45
s2599	0.0322624	-1.55	de	IPI_mouse (web) (local)	pure	IPI00761650	Psmd9	26S proteasome non-ATPase regulatory subunit 9	31	6.01	24876	6	78	0.00088	similar to 60S ribosomal protein L3	2.6	43	41	11	0.42	757.164017965397,758.43713197642,767.548856839976,846.517269659586,905.44890334737,921.451023288584,938.463046756925,1023.62609966301,1029.6606008486,1051.68759022686,1057.62952521743,1073.65175542811,1078.6041736031,1093.6288670198,1166.63181427887,1225.74014585596,1244.7460907892,1249.62383447102,1289.72397261127,1296.76460722215,1305.72430921874,1353.8371891346,1391.76339774038,1403.7572273841…	905.44890334737,921.451023288584,1078.6041736031,1166.63181427887,1289.72397261127,1305.72430921874,1353.8371891346,1391.76339774038,1422.70495887063,1430.81895403759,1822.85223224891,	48
s2108	0.00242553	NI	in	IPI_mouse (web) (local)	pure	IPI00830364	Htra2(omi)	46 kDa protein	43	6.23	45794	9.75	124	2.1e-08	LOC672557 similar to phosphodiesterase 6A	0.73	49	70	16	0.36	701.338302797597,758.435180718732,906.481710089943,931.453875716931,949.578300902865,970.576203026239,1003.56086331628,1015.56555543984,1051.71766420296,1089.64154340856,1092.67852361438,1155.6420217496,1177.6095586423,1193.64118380653,1201.66822879866,1226.60397306613,1230.60991495312,1242.62537172181,1254.6576406479,1262.67964665155,1263.74752909662,1277.75934895195,1284.75607112591,1333.757515…	701.338302797597,970.576203026239,1015.56555543984,1092.67852361438,1226.60397306613,1333.75751573798,1382.70819666911,1410.75414563261,1412.7649707462,1477.77770966326,1508.92450413027,1562.96880891766,1602.92726750274,2141.13422053796,2361.09878991108,2823.39885242693,	31
i2296	0.00596065	-1.66	de	IPI_mouse (web) (local)	pure	IPI00830896	Nit1	32 kDa protein	30	6.47	32493	6.59	116	1.4e-07	Dnajb13 DnaJ homolog subfamily B member 13	0.48	51	49	14	0.5	758.44494032865,846.531004462336,904.437680728642,906.468066332725,1001.53614928028,1051.70831916385,1079.54288727046,1132.53396791529,1161.66593980578,1177.65993972957,1213.61362824883,1219.59567074089,1235.666642088,1247.64560865784,1260.67278096736,1272.73410036645,1300.73134028714,1316.73062479749,1360.75878969627,1368.7074574568,1411.78168532205,1424.69482183204,1432.83163386117,1456.7872476…	1132.53396791529,1161.66593980578,1213.61362824883,1219.59567074089,1247.64560865784,1300.73134028714,1316.73062479749,1360.75878969627,1411.78168532205,1660.81861498092,1709.83627642313,1716.9112886132,1725.83191191016,1796.86475528462,	28
NI, the protein spots were newly appeared in ICSI testis
ND, the protein spots were not detectable in ICSI testis
in, the protein spots were up-regulated in ICSI testis
de, the protein spots were down-regulated in ICSI testis

## Sheet: Sheet2
Table S1: Identification of differentiated proteins using MALDI-TOF
SpotID	icsi-ivf	Entry Name	AC	Protein Name	Score	Converage%
i2793	de	IPI00111218	Aldh2	Aldehyde dehydrogenase, mitochondrial precursor	209	0.42
i876	in	IPI00115522	Fga	fibrinogen, alpha polypeptide	153	0.37
s872	in	IPI00119886	Isyna1	Myo-inositol 1-phosphate synthase A1	80	0.21
s2568	in	IPI00119945	Nit2	Nit protein 2	143	0.45
c1571	de	IPI00124692	Taldo1	Transaldolase	78	0.33
s2077	in	IPI00125091	Lasp1	LIM and SH3 domain protein 1	163	0.49
i1780	in	IPI00132194	Scye1	small inducible cytokine subfamily E, member 1	123	0.48
c2216	in	IPI00133110	Txndc12	Thioredoxin domain-containing protein 12 precursor	92	0.37
i2313	de	IPI00133801	1110005A23Rik	Nuclear protein Hcc-1	79	0.37
i1455	in	IPI00134746	Ass1	Argininosuccinate synthase	178	0.44
i957	de	IPI00223253	Hnrpk	Isoform 1 of Heterogeneous nuclear ribonucleoprotein K	110	0.29
s2074	in	IPI00223757	Akr1b3	Aldose reductase	70	0.3
c2961	de	IPI00230721	Crabp1	Cellular retinoic acid-binding protein 1	84	0.56
s2065	in	IPI00273096	Akr1b8	Aldose reductase-related protein 2	117	0.5
s1573	in	IPI00319992	Hspa5	78 kDa glucose-regulated protein precursor	71	0.25
i1960	in	IPI00323592	Mdh2	Malate dehydrogenase, mitochondrial precursor	89	0.37
c2528	de	IPI00337955	Polr2e	DNA-directed RNA polymerase II 23 kDa polypeptide	101	0.49
s977	in	IPI00379513	Fubp3	11 days pregnant adult female placenta cDNA, RIKEN full-length enric	98	0.32
i2747	de	IPI00405390	Nudt9	ADP-ribose pyrophosphatase, mitochondrial precursor	77	0.26
c2407	de	IPI00467266	Dut	10 days embryo whole body cDNA, RIKEN full-length enriched library, cl	110	0.79
i2876	in	IPI00649135	Gstm1	Glutathione S-transferase, mu 1	99	0.59
c2405	de	IPI00756400	Filip1	Filamin A interacting protein 1	86	0.17
s2599	de	IPI00761650	Psmd9	26S proteasome non-ATPase regulatory subunit 9	78	0.42
s2108	in	IPI00830364	Htra2(omi)	46 kDa protein	124	0.36
i2296	de	IPI00830896	Nit1	32 kDa protein	116	0.5
NI, the protein spots were newly appeared in ICSI testis
ND, the protein spots were not detectable in ICSI testis
in, the protein spots were up-regulated in ICSI testis
de, the protein spots were down-regulated in ICSI testis
